# Supplementary material
Source: PubMed Central journal article supplement (PMC2592639)
Supplement: E08-04-0416_1.pdf [file E08-04-0416_1.pdf]

**Supplementary Figure 1.** The antibodies AbDAF19N and AbDAF19C are specific for DAF-19

(A) Western blot on total worm protein from a mixed stage population. AbDAF19N detects a 120 kDa band in *wild type*, *daf-12* and *daf-19/mnC1* heterozygotes, but not in *daf-19* or *daf-19; daf-12* mutants.

(B-E) Immunocytochemistry stainings of the head regions of wild-type and *daf-19* adult worms. AbDAF19N and AbDAF19C detect DAF-19 in neurons of wild-type worms (B, D). The signal is lost in *daf-19* mutants (C, E). Arrowheads mark the location of the nerve ring and arrows the location of the cell bodies of amphid ciliated sensory neurons.

**Supplementary Figure 2.** Isoform-specific rescue of *daf-19*

(A-F) Single scan confocal micrographs showing the expression of DAF-19 and its direct targets, cilia proteins BBS-7 and OSM-5 in various transgenic *daf-19 (m86)* rescue lines.

(A-C) AbDAF19N detects DAF-19 in worms rescued for DAF-19A and for DAF-19A/B/C, but not in worms rescued for DAF-19C.

(D-F) AbDAF19C detects DAF-19 in all three rescue lines.

(C', C'', F', F'') Only DAF-19C is able to rescue the expression of the cilia proteins OSM-5 and BBS-7.

(B', B'', E', E'') DAF-19A, which is specific for non-ciliated neurons, does not rescue OSM-5 and BBS-7.

(A'''-F''') Schematics summarizing the expression of the three proteins DAF-19 (red), BBS-7 (green) and OSM-5 (white) in each transgenic line. Arrowheads depict ciliated sensory neurons, arrows depict non-ciliated neurons.

**Supplementary Figure 3.** Paralysis assays examining different cilia mutants and the effect of ectopic *daf-19a* expression in muscles

(A) The lack of sensory input (cilia mutants *che-13* and *osm-5*) does not cause resistance to aldicarb. (B) Ectopic expression of *daf-19a* in muscles (from the *unc-54* promoter) does not alter the paralysis phenotype of *daf-19*. Three independent transgenic lines (line 1-3) were tested.

# Supplementary Figure 1

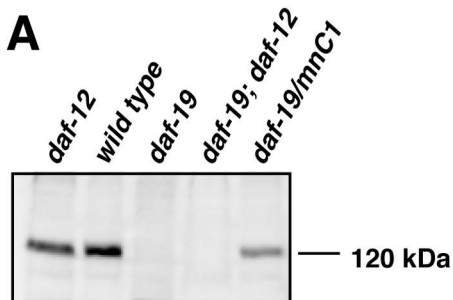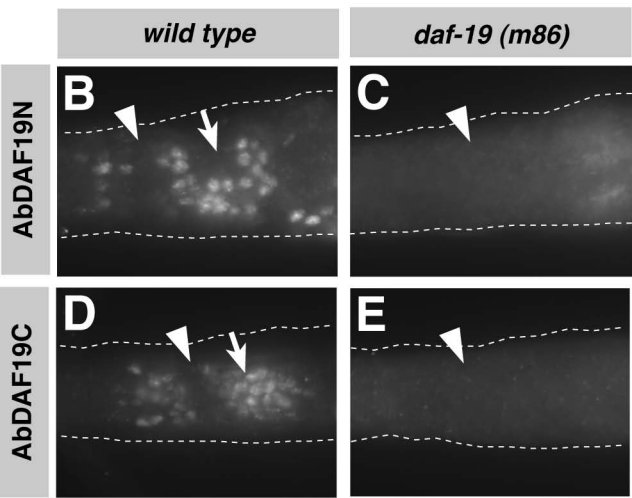

# Supplementary Figure 2

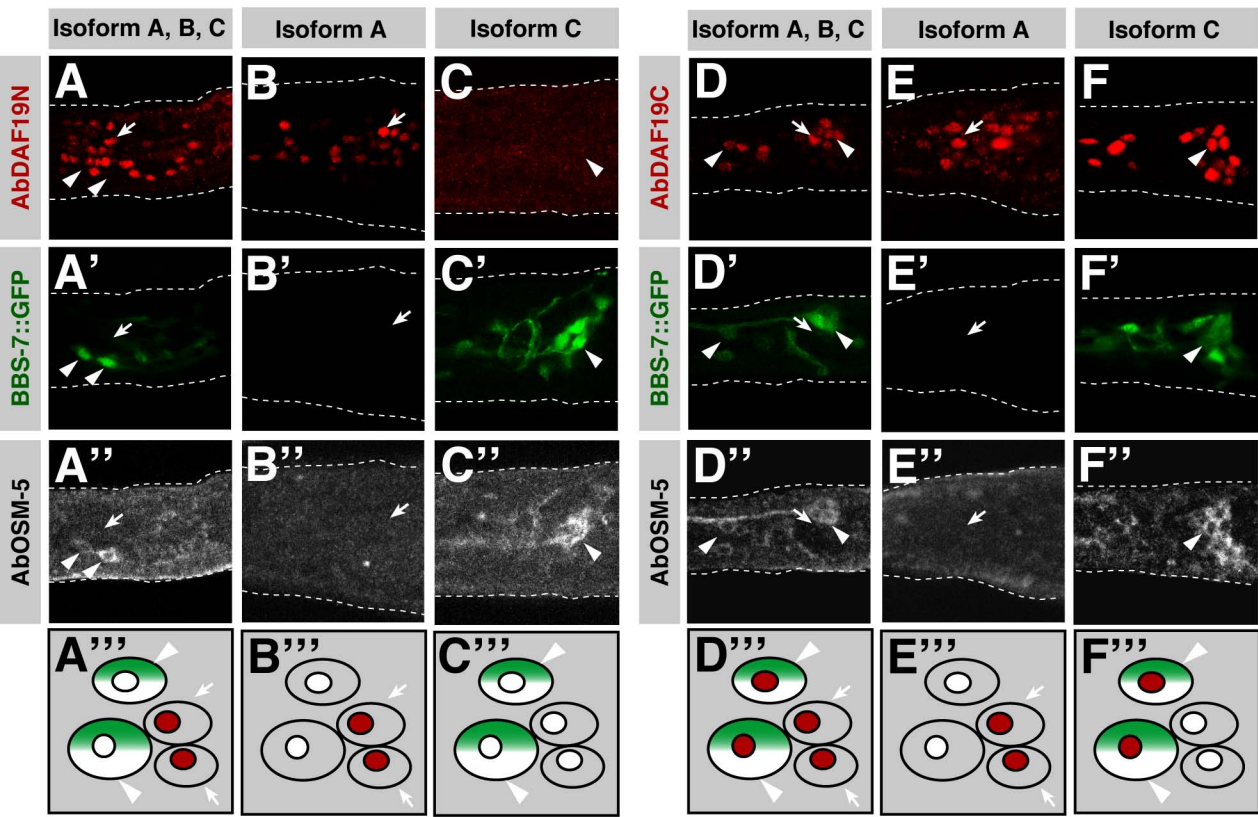

# Supplementary Figure 3

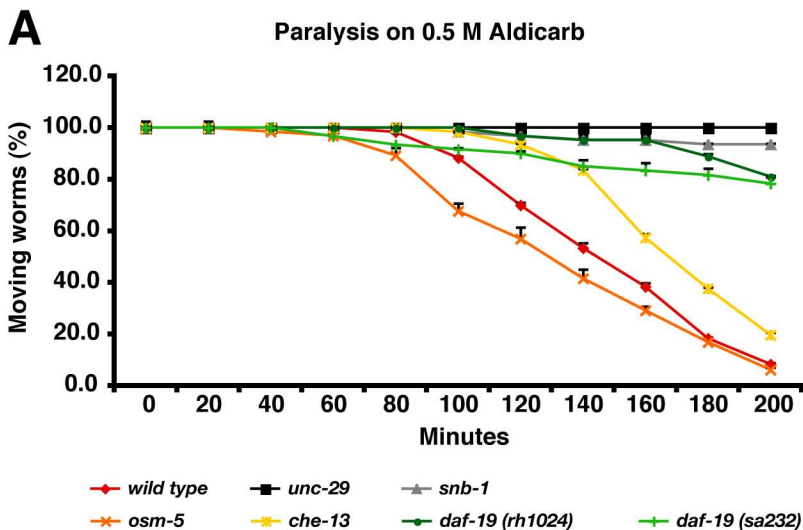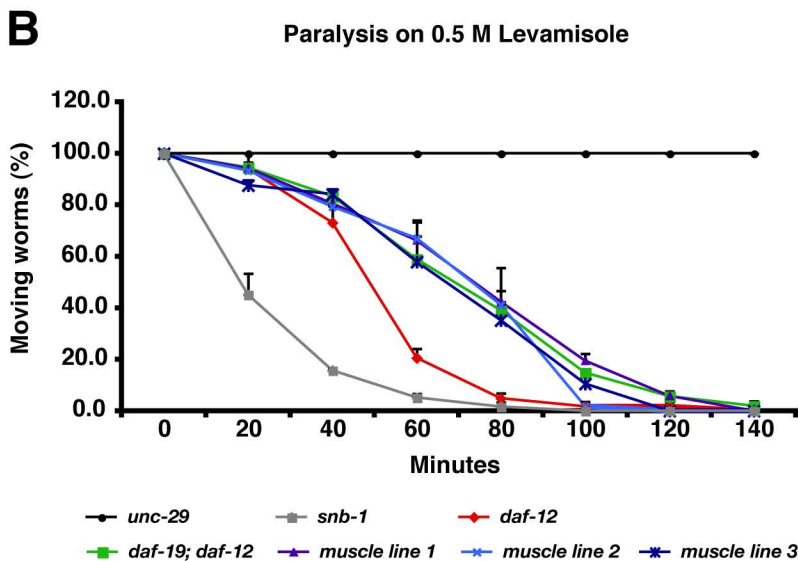

**Supplementary Table 1.** Co-expression analysis of DAF-19 A/B in *gfp* reporter lines

Worm strains that express *gfp* in specific subsets of neurons were stained with AbDAF19N, the antibody specific for DAF-19A/B, which specifically labels non-ciliated neurons. The only exceptions are FLP neurons, which can be considered as hybrid neurons since they bear characteristics of both ciliated sensory neurons as well as non-ciliated touch sensory neurons (Wu et al. (2001), Genes Dev 15, 789-802). In the neurons HSN, AVJ or AIN and AIM or RIH none of the DAF-19 isoforms was detected. We cannot rule out, that DAF-19 expression in those neurons is below detection level. Note that AVJ or AIN (marked with *adIs1240*), AIM or RIH (marked with *mgIs42*) and RIR (marked with *akEx51*) have not been clearly identified in the original publications.

|                                                               | Promoter      | Cilia | AbDAF19N |
|---------------------------------------------------------------|---------------|-------|----------|
| <b>Dopaminergic neurons (<i>egIs1</i>)</b>                    | <i>dat-1</i>  |       |          |
| ADEL/R, CEPD (2), CEPV (2), PDE (2)                           |               | √     | —        |
| <b>Serotonergic neurons (<i>mgIs42</i>)</b>                   | <i>tph-1</i>  |       |          |
| NSM                                                           |               | —     | √        |
| ADFL/R                                                        |               | √     | —        |
| <b>GABAergic neurons (<i>oxIs12</i>)</b>                      | <i>unc-47</i> |       |          |
| AVL, D motoneurons (19), DVB, RMEV (2), RMEL/R, RMED (2), RIS |               | —     | √        |
| <b>Glutamatergic neurons (<i>adIs1240</i>)</b>                | <i>eat-4</i>  |       |          |
| ADAL/R, ALML/R, AUAL/R, AVM, LUAL/R, PLML/R, PVDL/R, PVR      |               | —     | √        |
| FLPL/R                                                        |               | √     | √        |
| ASHL/R, ASKL/R, IL1 (6), OLQD (2), OLQV (2)                   |               | √     | —        |
| <b>Ciliated neurons (<i>kyIs4</i>)</b>                        | <i>ceh-23</i> |       |          |
| ADFL/R, ADLL/R, AFDL/R, ASEL/R, ASGL/R, ASHL/R, AWCL/R,       |               | √     | —        |
| BAGL/R, PHAL/R, PHBL/R                                        |               | √     | —        |
| AIYL/R, CANL/R                                                |               | —     | √        |
| <b>Interneurons (<i>akIs3</i>)</b>                            | <i>nmr-1</i>  |       |          |
| AVAL/R, AVDL/R, AVEL/R, AVG, PVCL/R, RIML/R                   |               | —     | √        |
| <b>Interneurons (<i>akEx130</i>)</b>                          | <i>glr-1</i>  |       |          |
| AIBL/R, AVAL/R, AVBL/R, AVDL/R, AVEL/R, AVG, PVCL/R,          |               | —     | √        |
| RIML/R, RMDL/R, RMDD (2), RMDV (2), SMDD (2), SMDV (2),       |               | —     | √        |
| URYD (2), URYV (2)                                            |               | —     | √        |
| <b>Interneurons (<i>akEx51</i>)</b>                           | <i>glr-2</i>  |       |          |
| AIAL/R, AIBL/R, AVAL/R, AVDL/R, AVEL/R, AVG, M1, PVCL/R,      |               | —     | √        |
| RIAL/R, RIGL/R, RIR, RMDD (2), RMDV (2)                       |               | —     | √        |
| <b>XXX cell (<i>dhIs64</i>)</b>                               | <i>daf-9</i>  |       |          |
| XXXL/R                                                        |               | —     | —        |

**Supplementary Table 2.** Quantification of signals in antibody stainings against SNB-1 and UNC-64 in *wild type*, *daf-19* mutant and rescue worms, and two different cilia mutants, *che-11* and *che-13* (see also Figure 6). Numbers are given in percentage as strong / medium / weak staining when compared to UNC-10, which was used as a co-marker since it is unchanged in *wild type* and *daf-19*. At least 40 animals were scored for each genotype and developmental stage.

| SNB-1 expression                  | L1/L2         |               |             | L3/L4         |               |             | Adults        |               |             |
|-----------------------------------|---------------|---------------|-------------|---------------|---------------|-------------|---------------|---------------|-------------|
|                                   | <u>strong</u> | <u>medium</u> | <u>weak</u> | <u>strong</u> | <u>medium</u> | <u>weak</u> | <u>strong</u> | <u>medium</u> | <u>weak</u> |
| <i>wild type</i>                  | 68            | 32            | 0           | 30            | 67            | 3           | 65            | 35            | 0           |
| <i>che-13 (e1805)</i>             | 63            | 37            | 0           | 23            | 75            | 7           | 63            | 37            | 0           |
| <i>che-11 (e1810)</i>             | 43            | 52            | 5           | 13            | 85            | 2           | 60            | 40            | 0           |
| <i>daf-19 (m86)</i>               | 20            | 77            | 3           | 10            | 88            | 2           | 17            | 63            | 20          |
| <i>daf-19 (rh1024)</i>            | 25            | 68            | 7           | 12            | 80            | 8           | 12            | 75            | 13          |
| <i>daf-19 (sa232)</i>             | 20            | 73            | 7           | 8             | 85            | 7           | 10            | 60            | 30          |
| <i>daf-19 (m86) +<br/>daf-19a</i> | 52            | 41            | 7           | 22            | 73            | 5           | 67            | 24            | 9           |

| UNC-64 expression                 | L1/L2         |               |             | L3/L4         |               |             | Adults        |               |             |
|-----------------------------------|---------------|---------------|-------------|---------------|---------------|-------------|---------------|---------------|-------------|
|                                   | <u>strong</u> | <u>medium</u> | <u>weak</u> | <u>strong</u> | <u>medium</u> | <u>weak</u> | <u>strong</u> | <u>medium</u> | <u>weak</u> |
| <i>wild type</i>                  | 40            | 57            | 3           | 33            | 67            | 0           | 69            | 27            | 5           |
| <i>che-13 (e1805)</i>             | 30            | 70            | 0           | 28            | 72            | 0           | 76            | 22            | 2           |
| <i>che-11 (e1810)</i>             | 23            | 75            | 2           | 28            | 70            | 2           | 66            | 32            | 2           |
| <i>daf-19 (m86)</i>               | 28            | 65            | 7           | 20            | 75            | 5           | 22            | 40            | 38          |
| <i>daf-19 (rh1024)</i>            | 30            | 63            | 7           | 28            | 57            | 15          | 10            | 47            | 43          |
| <i>daf-19 (sa232)</i>             | 30            | 65            | 5           | 23            | 67            | 10          | 15            | 34            | 51          |
| <i>daf-19 (m86) +<br/>daf-19a</i> | 24            | 67            | 9           | 22            | 69            | 9           | 57            | 38            | 5           |

**Supplementary Table 3.** Published lists of predicted x-box genes (Blacque et al., 2005 [OB], Chen et al., 2006 [NC], Efimenko et al., 2005 [EE]) were searched for potential functions at synapses or in vesicles as summarized in this Table. Genes marked in grey were investigated in detail in this study.

| Gene Model | Gene            | X-box              | Distance to the ATG | Reference | Predicted function/Homolog                                               |
|------------|-----------------|--------------------|---------------------|-----------|--------------------------------------------------------------------------|
| F42G8.11   | <i>sph-1</i>    | GTTTCT AC AGTAAC   | - 13                | OB        | Synaptophysin                                                            |
| F41B4.4b   | <i>glr-6</i>    | GTTTTT TT AAAAAC   | - 28                | EE        | Glutamate receptor                                                       |
| T12A2.15b  |                 | GTTTCC AT AACTAC   | - 51                | EE        | C2 domain vesicle protein                                                |
| C18E9.10   |                 | GTTTCT AT GATAAC   | - 53                | EE        | SFT-2 domain protein, membrane protein involved in Golgi to ER transport |
| F17E9.8    |                 | GTTACT GT AGAAAC   | - 68                | OB        | Neuronal acetylcholine receptor protein, alpha-6 chain precursor         |
| B0395.3    |                 | ATCACT AT AGTAAC   | - 88                | EE/OB     | Splice isoform 1 of P43155 Carnitine O-acetyltransferase                 |
| F23H12.1   | <i>snb-2</i>    | GTCTCC AT ATCAAA   | - 154               | OB/NC     | Vesicle-associated membrane protein 2                                    |
| T12A2.15a  |                 | GTTTCC AT AACTAC   | - 187               | OB        | C2 domain vesicle protein                                                |
| M03E7.5    |                 | ATTATT TT AAAAAC   | - 195               | EE        | Golgi SNAP complex vSNARE                                                |
| C40C9.2    | <i>acr-9</i>    | TTTTCA AT AGCAAC   | - 211               | OB/NC     | Neuronal acetylcholine receptor protein, alpha-7 chain precursor         |
| C31H5.3    | <i>acr-19</i>   | GTTTCA AT AGAAAT   | - 280               | OB/NC     | Neuronal acetylcholine receptor protein, alpha-7 chain precursor         |
| Y57A10A.16 |                 | GTTTTA AT GACACA   | - 312               | NC        | Trafficking protein particle complex 5                                   |
| Y69A2AR.2a | <i>ric-8</i>    | GTTTCG AT GCAAAT   | - 377               | NC        | Synembryn                                                                |
| C09E8.1    |                 | GTTGCC AT GATAAC   | - 411               | EE/NC     | Sodium neurotransmitter symporter                                        |
| F59E12.8   |                 | GTATTT AT AAAAAC   | - 420               | EE        | NMDA receptor subunit                                                    |
| ZK455.3    |                 | GTTTCG TT CGCAAC   | - 448               | EE/OB     | Galanin receptor type 2, catione/carnitine transporter                   |
| F37A4.7d   | <i>rbf-1</i>    | GTCTCC AA GGAAAC   | - 478               | EE/NC     | Rabphilin-3A                                                             |
| H35N03.1   | <i>exp-1</i>    | GTTTTT AT GGCCAC   | - 481               | EE/OB     | Splice isoform 1 of GABA receptor beta-3 subunit precursor               |
| T05C12.2   | <i>acr-14</i>   | GTAAC T AC GGTAAC  | - 496               | EE        | Neuronal acetylcholine receptor protein, alpha-7 chain precursor         |
| F35D2.5a   | <i>syd-1</i>    | GTCAC T AT AACAA C | - 530               | EE/OB/NC  | 7h3 protein                                                              |
| F48E3.7    | <i>acr-22</i>   | GTCTAC AT GCCAAC   | - 534               | OB        | Neuronal acetylcholine receptor protein, alpha-9 chain precursor         |
| F08F8.8    |                 | ATTCT T TT GAAAC   | - 540               | EE        | Golgi vSNARE                                                             |
| ZK1098.5   |                 | TTCTCC AT GGCAAG   | - 598               | OB        | Trafficking protein particle complex subunit 3                           |
| T01B11.3   | <i>syn-4</i>    | GTGTCC AT GACAA C  | - 676               | OB/NC     | Syntaxin 1B2                                                             |
| F37A4.7a   | <i>rbf-1</i>    | GTAACC AC GATAAC   | - 804               | OB        | Rabphilin-3A                                                             |
| Y58G8A.1   |                 | GTTTCC GT AGTAAT   | - 822               | OB        | Acetylcholine receptor protein, beta chain precursor                     |
| F55A4.1    |                 | GTTTTT TT AAAAAC   | - 862               | EE        | Vesicle protein sec-22                                                   |
| F12F6.6    | <i>sec-24.1</i> | ATATTT AT AGGAAC   | - 868               | EE        | COPII protein                                                            |
| T22F7.3    |                 | GTTACT GT AGCAAT   | - 934               | OB        | Splice isoform Alpha of P10646 Tissue factor pathway inhibitor precursor |
| T22F7.1    |                 | GTTATC TT GGTAAC   | - 966               | EE/NC     | Carrier protein (synaptic vesicle protein)                               |
| C08G5.4    | <i>snt-6</i>    | GTTTCT AT GCCAAT   | - 967               | OB        | Synaptotagmin VII                                                        |
| C18E9.2    |                 | GTTATC AT AGAAAC   | - 991               | OB        | Translocation protein-1                                                  |
| F55A4.4    |                 | GTAACA AT AGTAAC   | - 1026              | OB        | 39k3 protein                                                             |
| T23H2.2    | <i>snt-4</i>    | ATTACC TT GCCAAC   | - 1226              | OB        | Synaptotagmin IV                                                         |
| F09E8.7    | <i>lev-1</i>    | GCTTCC AT AGAAAT   | - 1399              | OB/NC     | Neuronal acetylcholine receptor protein, alpha-4 chain precursor         |



**Supplementary Table 4.** Strains and transgenes (extra-chromosomal and integrated arrays) used for this study

**A. STRAINS**

| <b>Strain</b> | <b>Relevant transgene</b> | <b>Genotype</b>                                                     |
|---------------|---------------------------|---------------------------------------------------------------------|
| AA277         | <i>daf-9::gfp</i>         | [ <i>lin-15</i> (n765); <i>dhIs64</i> ]                             |
| BZ555         | <i>dat-1::gfp</i>         | [ <i>egIs1</i> ]                                                    |
| CB1072        |                           | [ <i>unc-29</i> ( <i>e1072</i> )]                                   |
| CX2565        | <i>ceh-23::gfp</i>        | [ <i>lin-15</i> (n765); <i>kyIs4</i> ]                              |
| DA1240        | <i>eat-4::gfp</i>         | [ <i>lin-15</i> (n765); <i>adIs1240</i> ]                           |
| EG1285        | <i>unc-47::gfp</i>        | [ <i>lin-15</i> (n765); <i>oxIs12</i> ]                             |
| GR1366        | <i>tph-1::gfp</i>         | [ <i>mgIs42</i> ]                                                   |
| JT204         |                           | [ <i>daf-12</i> ( <i>sa204</i> )]                                   |
| JT5010        |                           | (wild-type N2 Bristol)                                              |
| JT6924        |                           | [ <i>daf-19</i> ( <i>m86</i> ); <i>daf-12</i> ( <i>sa204</i> )]     |
| JT8651        |                           | [ <i>daf-19</i> ( <i>m86</i> )/ <i>mnC1</i> ; <i>lin-15</i> (n765)] |
| MT1642        |                           | [ <i>lin-15</i> (n765)]                                             |
| NM467         |                           | [ <i>snb-1</i> ( <i>md247</i> )]                                    |
| OE3000        |                           | [ <i>che-13</i> ( <i>n1520</i> ); <i>him-8</i> ( <i>e1489</i> )]    |
| OE3035        |                           | [ <i>daf-19</i> ( <i>sa232</i> ); 6x outcrossed]                    |
| OE3059        |                           | [ <i>daf-19</i> ( <i>rh1024</i> ); 6x outcrossed]                   |
| OE3063        |                           | [ <i>daf-19</i> ( <i>m86</i> ); 6x outcrossed]                      |
| VM182         | <i>glr-2::gfp</i>         | [ <i>lin-15</i> (n765); <i>akEx51</i> ]                             |
| VM484         | <i>nmr-1::gfp</i>         | [ <i>akIs3</i> ]                                                    |
| VM763         | <i>glr-1::gfp</i>         | [ <i>lin-15</i> (n765); <i>akEx130</i> ]                            |

**B. EXTRA-CHROMOSOMAL AND INTEGRATED ARRAYS**

| <b>Relevant transgene</b> | <b>Type of construct</b>                  | <b>Genotype</b>                 |
|---------------------------|-------------------------------------------|---------------------------------|
| <i>B0395.3::gfp</i>       | promoter <i>gfp</i> fusion                | <i>ofEx301</i> , <i>ofEx302</i> |
| <i>C18E9.10::gfp</i>      | promoter <i>gfp</i> fusion                | <i>ofEx333</i> , <i>ofEx338</i> |
| <i>F17E9.8::gfp</i>       | promoter <i>gfp</i> fusion                | <i>ofEx324</i> , <i>ofEx325</i> |
| <i>glr-1::gfp</i>         | translational <i>gfp</i> fusion           | <i>akEx130</i>                  |
| <i>ida-1::gfp</i>         | translational <i>gfp</i> fusion           | <i>ofEx260</i> , <i>ofEx261</i> |
| <i>jnk-1::gfp</i>         | translational <i>gfp</i> fusion           | <i>ofEx61</i> , <i>ofEx62</i>   |
| pGG20                     | <i>daf-19</i> intron 3- <i>gfp</i> fusion | <i>ofEx308</i> , <i>ofEx309</i> |
| pGG21                     | <i>daf-19</i> intron 4- <i>gfp</i> fusion | <i>ofEx310</i> , <i>ofEx311</i> |
| pGG14                     | genomic <i>daf-19</i> construct           | <i>ofEx27</i> , <i>ofEx42</i>   |
| pGG18                     | genomic <i>daf-19</i> construct           | <i>ofEx375</i> , <i>ofEx376</i> |
| pGG67                     | <i>daf-19a</i> rescue construct           | <i>ofEx316</i> , <i>ofEx165</i> |
| pTJ786                    | genomic <i>daf-19</i> construct           | <i>ofEx168</i> , <i>ofEx169</i> |
| pTJ803                    | <i>daf-19c</i> rescue construct           | <i>ofEx163</i> , <i>ofEx164</i> |
| <i>snb-1::gfp</i>         | translational <i>gfp</i> fusion           | <i>ofEx304</i> , <i>ofEx305</i> |
| <i>sng-1::gfp</i>         | translational <i>gfp</i> fusion           | <i>jsIs219</i>                  |
| <i>syd-1::gfp</i>         | translational <i>gfp</i> fusion           | <i>juIs40</i>                   |
| <i>unc-43::gfp</i>        | translational <i>gfp</i> fusion           | <i>ofEx263</i> , <i>ofEx297</i> |
| <i>unc-104::gfp</i>       | translational <i>gfp</i> fusion           | <i>ofEx305</i> , <i>ofEx306</i> |
| <i>unc-54::daf-19a</i>    | muscle-specific <i>daf-19</i> expression  | <i>ofEx585</i> to <i>587</i>    |
